# Supplementary material for: Border-ownership tuning determines the connectivity between V4 and V1 in the macaque visual system
Source: PubMed Central journal article supplement — Nat Commun. 2024 Oct 23;15:9115. doi: 10.1038/s41467-024-53256-8 (PMC11496508; doi:10.1038/s41467-024-53256-8), 2024-10-23
Supplement: 41467_2024_53256_MOESM3_ESM.pdf [file 41467_2024_53256_MOESM3_ESM.pdf]

**File name: Supplementary Movie 1**

Description: A 3D visualization of the linear regression with conventions as in Figure 4A of the manuscript.
